# Supplementary material
Source: PubMed Central journal article supplement (PMC404104)

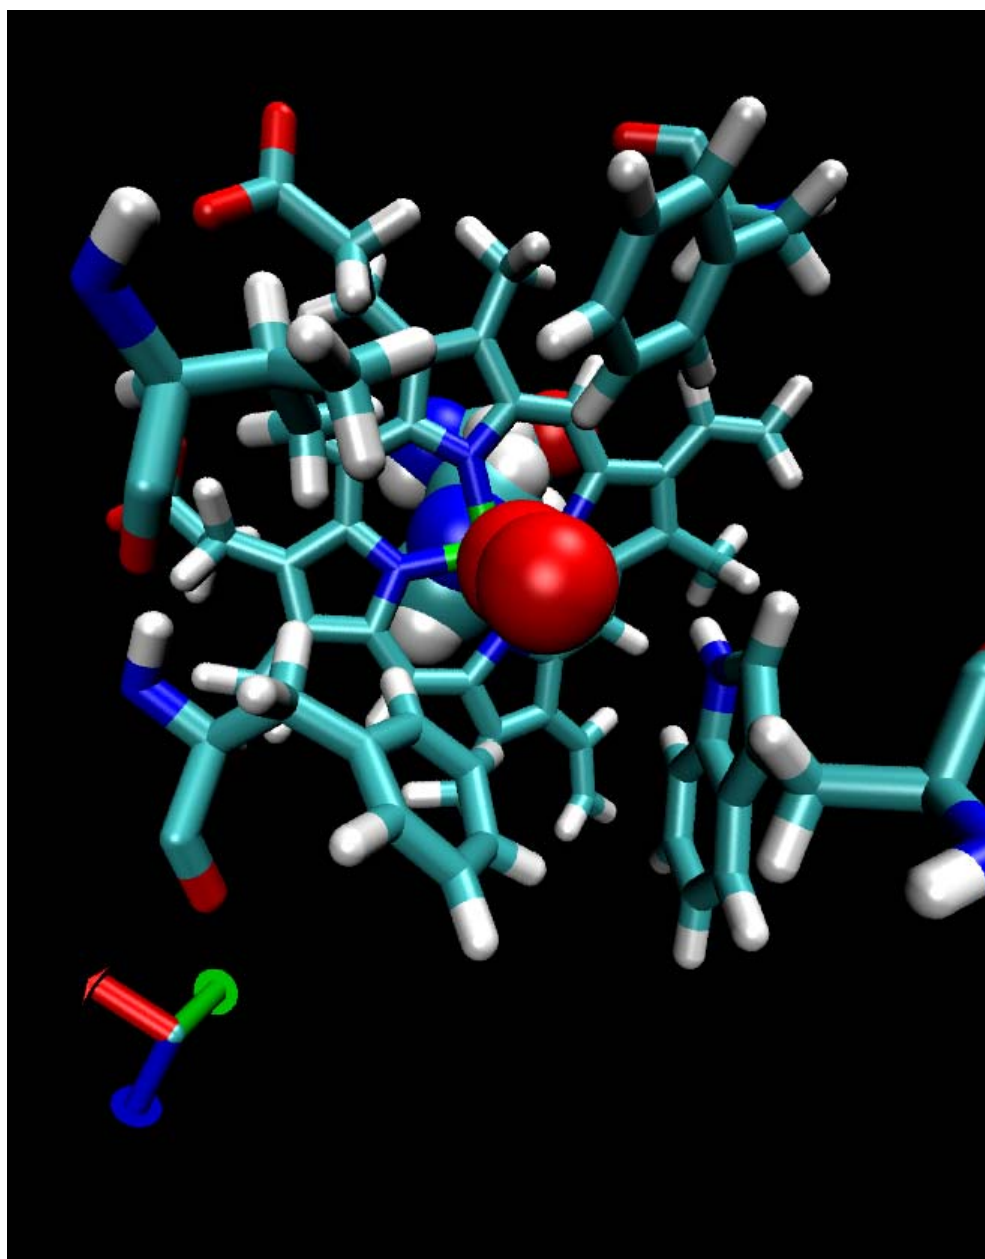

Supplement: pnas_101_17_6675__1.pdf [file pnas_101_17_6675__1.pdf]

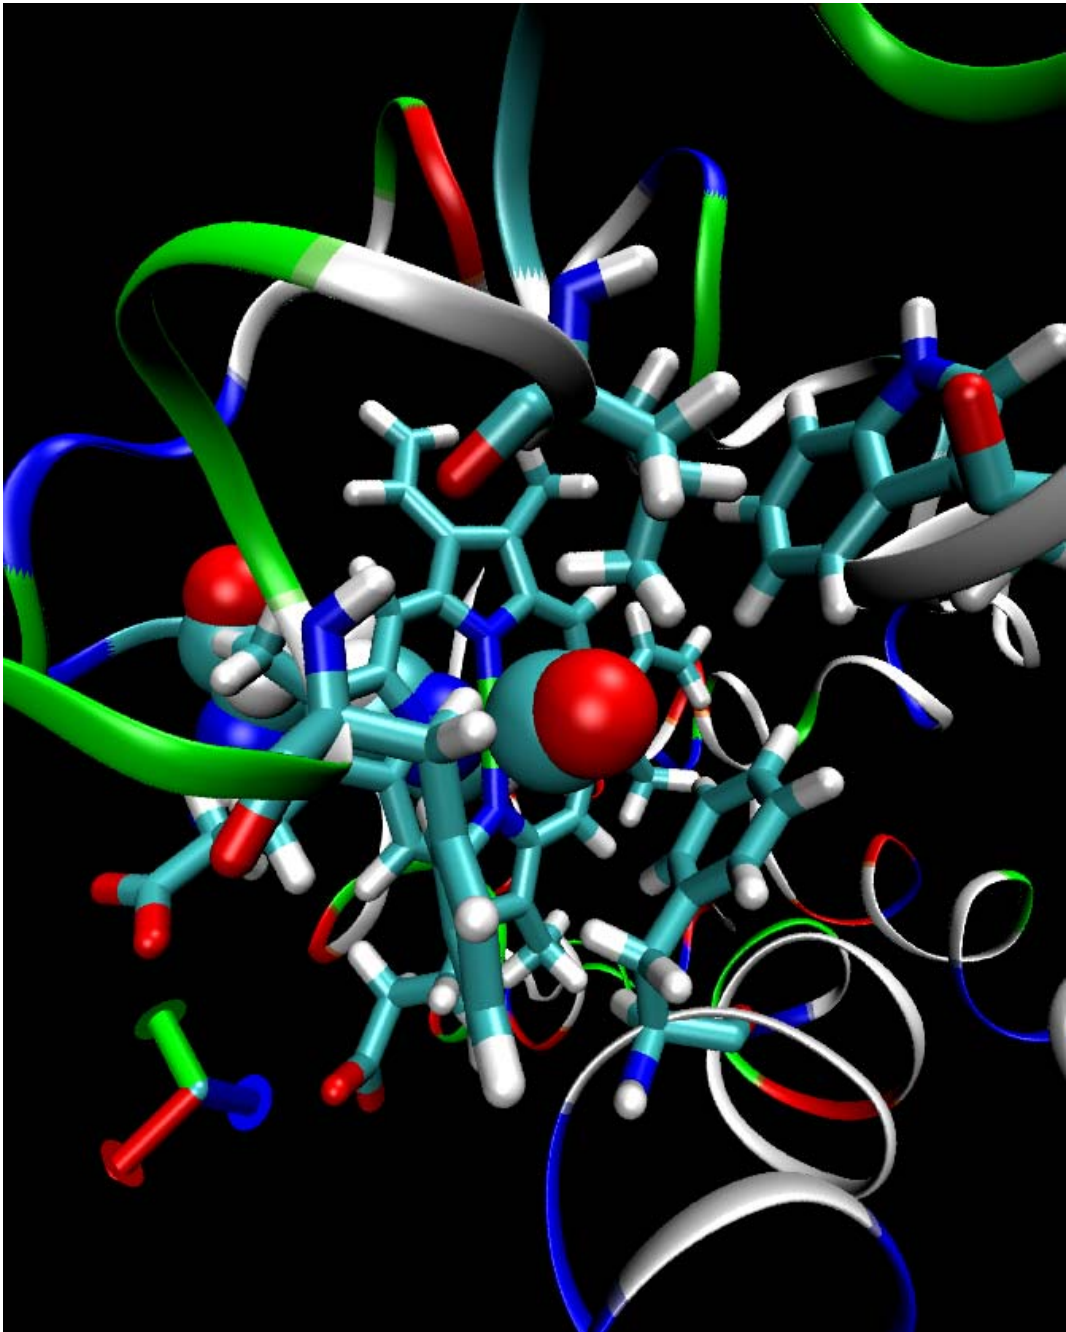

Supplement: pnas_101_17_6675__2.pdf [file pnas_101_17_6675__2.pdf]
